# Supplementary material
Source: MDPI journal article supplement (https://www.mdpi.com/2624-8611/3/4/36)
Supplement: s1 [file s1]

Client name:

Date:

**DEMENTIA CAREGIVER INTERVIEW GUIDE (D-CIG)**

|                                                                                                                                                                                                                                                                                                                             |                                                                                                  |                                                                            |                    |                             |                    |                 |
|-----------------------------------------------------------------------------------------------------------------------------------------------------------------------------------------------------------------------------------------------------------------------------------------------------------------------------|--------------------------------------------------------------------------------------------------|----------------------------------------------------------------------------|--------------------|-----------------------------|--------------------|-----------------|
| <b>High Risk Caregiver Definition:</b> The caregiver's well-being is in jeopardy and/or the care being provided is deteriorating. There is high risk for the impending failure of the caregiver to continue to provide the current level of care. <i>Adapted from Guberman, Keefe, Fancey, Nahmiash &amp; Barylak, 2001</i> |                                                                                                  |                                                                            |                    | <b>Intensity of problem</b> |                    |                 |
|                                                                                                                                                                                                                                                                                                                             |                                                                                                  |                                                                            |                    | Low                         | Med                | High            |
| <b>(1) Is the amount or length of time spent in the caregiving role a problem?</b><br>(e.g., Number of years providing care <i>or</i> intensity of time providing care)                                                                                                                                                     |                                                                                                  |                                                                            |                    | L                           | M                  | H               |
| <b>(2) Care-recipient (CR) Characteristics:</b> Check all that apply                                                                                                                                                                                                                                                        |                                                                                                  |                                                                            |                    |                             |                    |                 |
| <b>Physical Issues</b>                                                                                                                                                                                                                                                                                                      |                                                                                                  |                                                                            |                    | L                           | M                  | H               |
| <input type="checkbox"/> Decline in ADLs and IADLs*                                                                                                                                                                                                                                                                         | <input type="checkbox"/> Disrupted sleep                                                         | <input type="checkbox"/> Substance use                                     |                    |                             |                    |                 |
| <input type="checkbox"/> Other chronic illness                                                                                                                                                                                                                                                                              | <input type="checkbox"/> Other acute illness                                                     |                                                                            |                    |                             |                    |                 |
| <b>Dementia-specific Issues</b>                                                                                                                                                                                                                                                                                             |                                                                                                  |                                                                            |                    | L                           | M                  | H               |
| <input type="checkbox"/> Apathy                                                                                                                                                                                                                                                                                             | <input type="checkbox"/> Wandering/ Restlessness                                                 | <input type="checkbox"/> Aggression (verbal or physical)                   |                    |                             |                    |                 |
| <input type="checkbox"/> Depression                                                                                                                                                                                                                                                                                         | <input type="checkbox"/> Sexually inappropriate behaviour                                        | <input type="checkbox"/> Poor social skills                                |                    |                             |                    |                 |
| <input type="checkbox"/> Poor communication                                                                                                                                                                                                                                                                                 | <input type="checkbox"/> Delusions/ Hallucinations                                               | <input type="checkbox"/> Vocalizations                                     |                    |                             |                    |                 |
| <b>(3) Caregiver (CG) Characteristics:</b> Check all that apply                                                                                                                                                                                                                                                             |                                                                                                  |                                                                            |                    |                             |                    |                 |
| <b>Psychological Characteristics</b>                                                                                                                                                                                                                                                                                        |                                                                                                  |                                                                            |                    | L                           | M                  | H               |
| <input type="checkbox"/> Low self-confidence in CG tasks                                                                                                                                                                                                                                                                    | <input type="checkbox"/> Guilt                                                                   | <input type="checkbox"/> Poorly defined sense of self separate from the CR |                    |                             |                    |                 |
| <input type="checkbox"/> Poor mastery of CG tasks                                                                                                                                                                                                                                                                           | <input type="checkbox"/> Suicidal ideation                                                       | <input type="checkbox"/> Lack of management/ Organizational skills         |                    |                             |                    |                 |
| <input type="checkbox"/> Symptoms of depression                                                                                                                                                                                                                                                                             | <input type="checkbox"/> Substance abuse                                                         | <input type="checkbox"/> Coping through emotional reasoning or avoidance   |                    |                             |                    |                 |
| <input type="checkbox"/> Symptoms of anxiety                                                                                                                                                                                                                                                                                | <input type="checkbox"/> Anger                                                                   | <input type="checkbox"/> Interfering personality characteristics           |                    |                             |                    |                 |
| <input type="checkbox"/> Feeling trapped in the CG role                                                                                                                                                                                                                                                                     |                                                                                                  | <input type="checkbox"/> Psychiatric history (e.g., depression, anxiety)   |                    |                             |                    |                 |
| <input type="checkbox"/> Low resilience to CG stress                                                                                                                                                                                                                                                                        |                                                                                                  | <input type="checkbox"/> Challenging relationship history between CR & CG  |                    |                             |                    |                 |
| <b>Barriers to Change</b>                                                                                                                                                                                                                                                                                                   |                                                                                                  |                                                                            |                    | L                           | M                  | H               |
| <input type="checkbox"/> Ambivalence or denial of need                                                                                                                                                                                                                                                                      | <input type="checkbox"/> Resistance to use resources                                             | <input type="checkbox"/> Pressure from cultural group                      |                    |                             |                    |                 |
| <input type="checkbox"/> Stigma/ Shame                                                                                                                                                                                                                                                                                      | <input type="checkbox"/> Afraid of change                                                        |                                                                            |                    |                             |                    |                 |
| <b>Physical Issues</b>                                                                                                                                                                                                                                                                                                      |                                                                                                  |                                                                            |                    | L                           | M                  | H               |
| <input type="checkbox"/> Chronic illness/ Physical frailty                                                                                                                                                                                                                                                                  | <input type="checkbox"/> Acute illness                                                           | <input type="checkbox"/> Cognitive impairment                              |                    |                             |                    |                 |
| <input type="checkbox"/> Over 65 years old                                                                                                                                                                                                                                                                                  | <input type="checkbox"/> Disrupted sleep                                                         |                                                                            |                    |                             |                    |                 |
| <b>Dementia-specific Issues</b>                                                                                                                                                                                                                                                                                             |                                                                                                  |                                                                            |                    | L                           | M                  | H               |
| <input type="checkbox"/> Poor knowledge of dementia                                                                                                                                                                                                                                                                         | <input type="checkbox"/> Inaccurate beliefs about care recipient's behaviour                     |                                                                            |                    |                             |                    |                 |
| <b>(4) Environment:</b> Check all that apply                                                                                                                                                                                                                                                                                |                                                                                                  |                                                                            |                    |                             |                    |                 |
| <b>Support</b>                                                                                                                                                                                                                                                                                                              |                                                                                                  |                                                                            |                    | L                           | M                  | H               |
| <input type="checkbox"/> Family discord                                                                                                                                                                                                                                                                                     | <input type="checkbox"/> Lack of support (formal or informal)                                    | <input type="checkbox"/> Poor program availability                         |                    |                             |                    |                 |
| <input type="checkbox"/> Lack of respite                                                                                                                                                                                                                                                                                    | <input type="checkbox"/> Transportation                                                          | <input type="checkbox"/> Long wait-times for services                      |                    |                             |                    |                 |
| <b>Resources</b>                                                                                                                                                                                                                                                                                                            |                                                                                                  |                                                                            |                    | L                           | M                  | H               |
| <input type="checkbox"/> Financial stress                                                                                                                                                                                                                                                                                   | <input type="checkbox"/> Employment stressors/ Job-Caregiving conflict                           |                                                                            |                    |                             |                    |                 |
| <input type="checkbox"/> Legal issues                                                                                                                                                                                                                                                                                       | <input type="checkbox"/> Caregiver responsible for multiple households/ Multiple care recipients |                                                                            |                    |                             |                    |                 |
| <b>(5) Barriers to Accessing Resources:</b> Check all that apply                                                                                                                                                                                                                                                            |                                                                                                  |                                                                            |                    | L                           | M                  | H               |
| <input type="checkbox"/> Language                                                                                                                                                                                                                                                                                           | <input type="checkbox"/> Poor knowledge of the system                                            | <input type="checkbox"/> Poverty                                           |                    |                             |                    |                 |
| <input type="checkbox"/> Cultural group                                                                                                                                                                                                                                                                                     | <input type="checkbox"/> Isolation                                                               | <input type="checkbox"/> Low education                                     |                    |                             |                    |                 |
| <input type="checkbox"/> LGBT                                                                                                                                                                                                                                                                                               | <input type="checkbox"/> Location/ Access to services                                            | <input type="checkbox"/> Housing uncertainty                               |                    |                             |                    |                 |
| <b>(6) Caregiver-identified Overload:</b>                                                                                                                                                                                                                                                                                   |                                                                                                  |                                                                            |                    | 0-1                         | 2-4                | 5+              |
| Does the caregiver complain of feeling like (s)he has to do more than (s)he can handle or "stretched to the limit"? <b>How many of the last 7 days?</b>                                                                                                                                                                     |                                                                                                  |                                                                            |                    |                             |                    |                 |
| <b>Clinical Impression:</b> How concerned are you that the <i>caregiver's well-being is in jeopardy OR the care being provided will deteriorate</i> if they continue to try to provide the current level of care under the current circumstances?                                                                           |                                                                                                  |                                                                            |                    |                             |                    |                 |
| No concern                                                                                                                                                                                                                                                                                                                  | Minimal concern                                                                                  | Mild concern                                                               | Moderate concern   | Marked concern              | Severe concern     | Extreme concern |
| Within normal limits                                                                                                                                                                                                                                                                                                        |                                                                                                  |                                                                            | Possible High Risk |                             | Probable High Risk |                 |

\* ADLs = Activities of Daily Living: e.g., bathing, toileting, dressing, eating, functional mobility

\* IADLs = Instrumental ADLs: e.g., housework, organizing medication, finances, shopping, using a telephone, transportation

Name &amp; Designation

Date
